# Supplementary material for: TRAIL Receptor Targeting Agents Potentiate PARP Inhibitor Efficacy in Pancreatic Cancer Independently of BRCA2 Mutation Status
Source: MDPI journal article supplement (doi:10.3390/cancers14215240), 2022-10-26
Supplement: s1 [file s1]

A

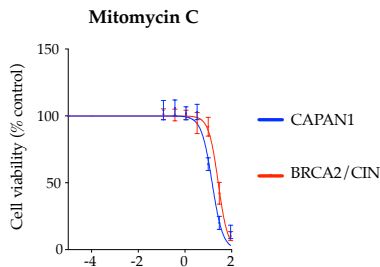

B

| Compound(unit)   | IC50   |                     | IC50 ratio |
|------------------|--------|---------------------|------------|
|                  | CAPAN1 | CAPAN1<br>BRCA2/CIN |            |
| Mitomycin C (nm) | 1463   | 2677                | 0.55       |

C

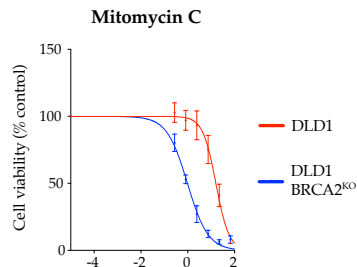

D

| Compound(unit)   | IC50                        |      | IC50 ratio |
|------------------|-----------------------------|------|------------|
|                  | DLD1<br>BRCA2 <sup>KO</sup> | DLD1 |            |
| Mitomycin C (nm) | 098                         | 1604 | 0.06       |

Figure S3. BRCA2 deficiency enhances the sensitivity of cancer cells towards mitomycin C. SYBR green proliferation assay of BRCA2 deficient CAPAN1 and the respective syngenic BRCA2/CIN cell line complemented to express wild-type BRCA2 (A, B) and homozygous BRCA2 knockout colorectal cancer cell line DLD1 termed DLD1 BRCA2<sup>KO</sup> vs. wild-type DLD1 cells (C, D) after 6 days of treatment with olaparib or TRAIL in increasing concentrations. All experiments were performed at least in duplicates with error bars representing SEM from independent experiments. B, D: IC50 values obtained for each compound tested and their ratio, defined as IC50 in the context of BRCA2 deficiency divided by IC50 in the context of BRCA2 proficiency.
