# Supplementary material for: TRAIL Receptor Targeting Agents Potentiate PARP Inhibitor Efficacy in Pancreatic Cancer Independently of BRCA2 Mutation Status
Source: MDPI journal article supplement (doi:10.3390/cancers14215240), 2022-10-26
Supplement: s1 [file s1]

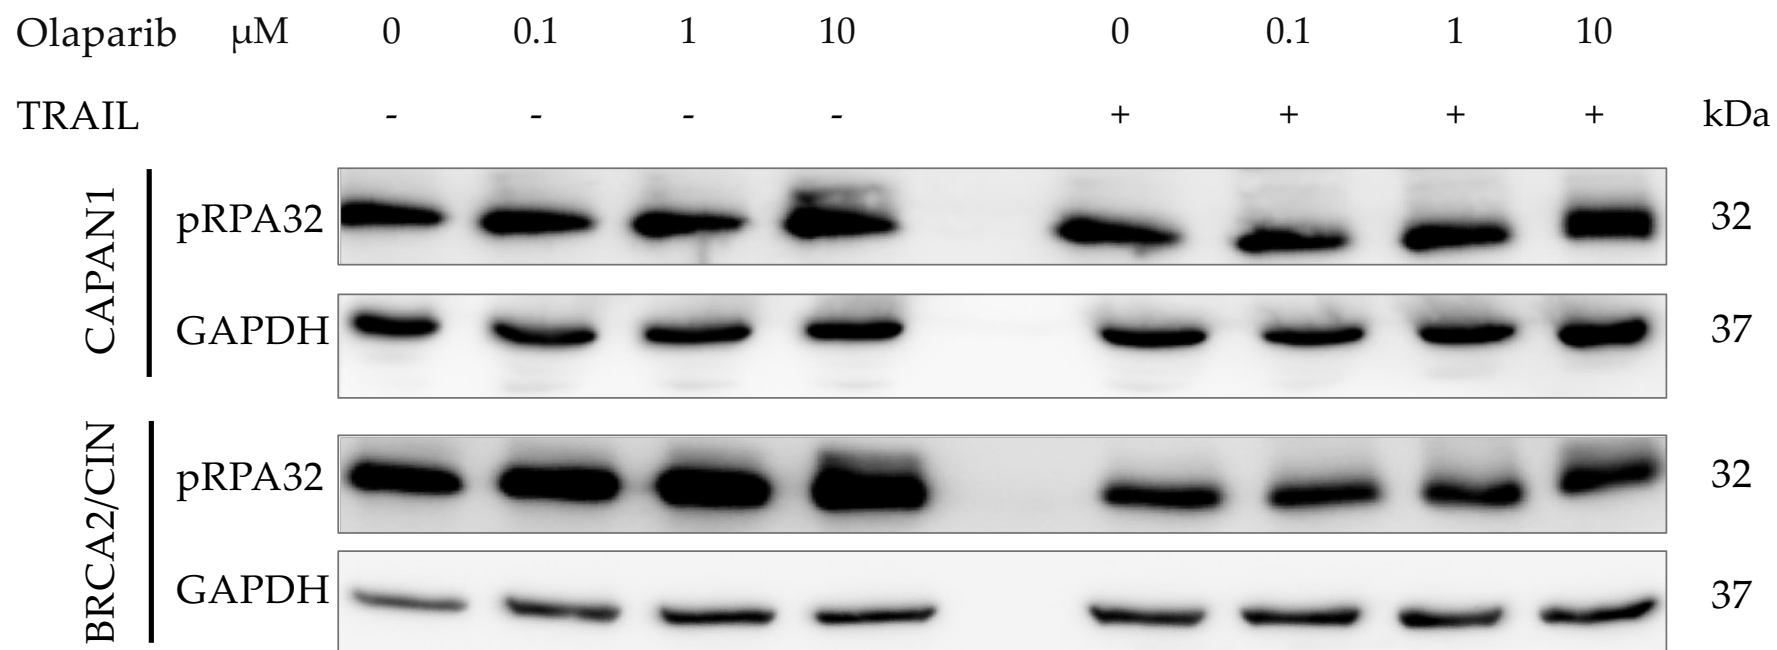

**Figure S8.** Western blot analysis to assess the expression levels of pRPA32 in BRCA2 deficient CAPAN1 vs. wild-type BRCA2 expressing BRCA2/CIN treated with various doses of olaparib alone or in combination with TRAIL (10 ng/ml) for 48 h. Data shows representative results from three experiments. GAPDH served as loading control.
