# Supplementary material for: TRAIL Receptor Targeting Agents Potentiate PARP Inhibitor Efficacy in Pancreatic Cancer Independently of BRCA2 Mutation Status
Source: MDPI journal article supplement (doi:10.3390/cancers14215240), 2022-10-26
Supplement: s1 [file s1]

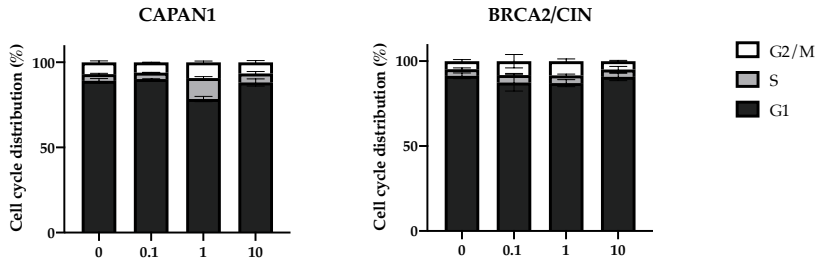

**Figure S4.** CAPAN1 and the wild-type BRCA2 expressing BRCA2/CIN were treated with various doses of TRAIL for 48 h. Error bars represent mean  $\pm$  SEM from two experiments.
