# Supplementary material for: TRAIL Receptor Targeting Agents Potentiate PARP Inhibitor Efficacy in Pancreatic Cancer Independently of BRCA2 Mutation Status
Source: MDPI journal article supplement (doi:10.3390/cancers14215240), 2022-10-26
Supplement: s1 [file s1]

## CAPAN1

Control

Olaparib

Olaparib  
+ TRAIL

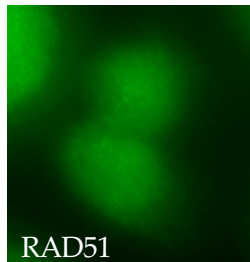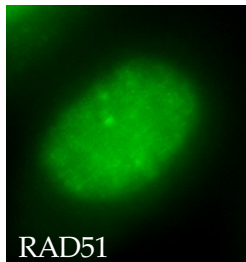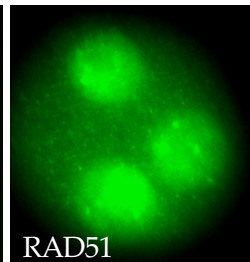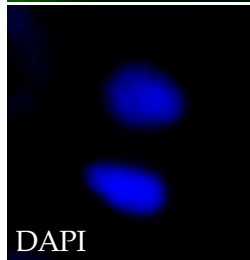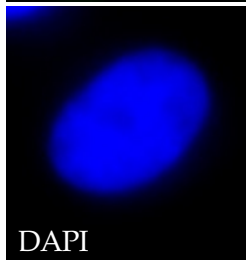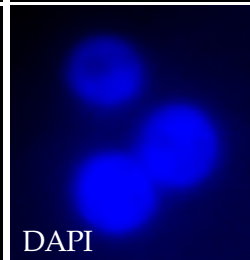

## BRCA2/CIN

Control

Olaparib

Olaparib  
+ TRAIL

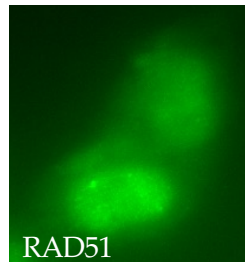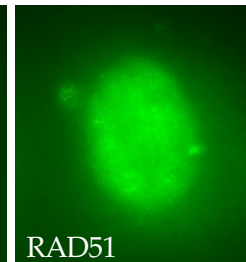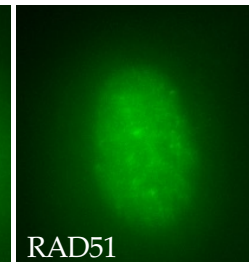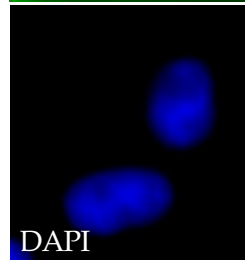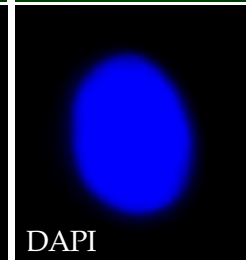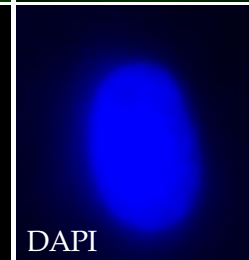

Figure S7: RAD51 immunostaining of *BRCA2* deficient CAPAN1 vs. wild-type *BRCA2* expressing BRCA2/CIN treated with 10  $\mu$ M olaparib +/- 10 ng/ml TRAIL or dimethyl sulfoxide (DMSO) control for 48 h.
