# Supplementary material for: TRAIL Receptor Targeting Agents Potentiate PARP Inhibitor Efficacy in Pancreatic Cancer Independently of BRCA2 Mutation Status
Source: MDPI journal article supplement (doi:10.3390/cancers14215240), 2022-10-26
Supplement: s1 [file s1]

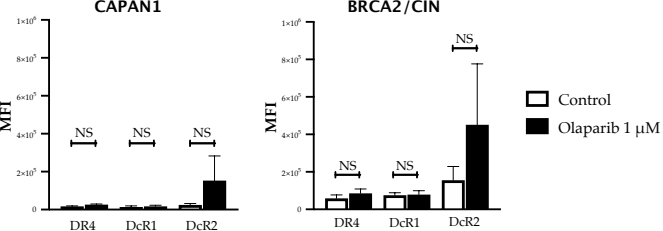

Figure S5. Flow cytometry of TRAIL surface receptors. Death receptor 4 (DR4), membrane-bound decoy receptor 1 (DcR1) and decoy receptor 2 (DcR2) were stained in BRCA2 deficient CAPAN1 vs. wild-type BRCA2 expressing BRCA2/CIN treated with 1  $\mu$ M olaparib for 6 days. Error bars represent mean  $\pm$  SEM from at least three experiments. NS = non-significant,  $P \geq 0.05$ , MFI=median fluorescence intensity.
